# Supplementary material
Source: PubMed Central journal article supplement (PMC3093884)

### Supplementary Data

Supplementary data consists of two figures.

**Supplementary Figure 1.** Nek9[ $\Delta$ 346-732, S944A] activity. (A) anti-FLAG immunoprecipitates from HEK293T cells expressing the indicated forms of FLAG-Nek9[ $\Delta$ 346-732] (*ARCC1*), were immunoblotted with antibodies against FLAG and active Nek9 (*a-Nek9[Thr210-P]*) (B) The indicated forms of FLAG-Nek9 [ $\Delta$ 346-732] (*ARCC1*), were immunoprecipitated from HEK293T cells, washed and incubated for the indicated times at 30°C in phosphorylation buffer with [ $\gamma$ - $^{32}$ P]ATP and MBP. The reaction was stopped by addition of SDS sample buffer plus boiling, followed by SDS-PAGE.  $^{32}$ P incorporation into MBP as measured by PhosphoImager is shown together with MBP Coomassie staining (*Coomassie*) and  $^{32}$ P incorporation ( $^{32}$ P *autorad.*).

**Supplementary Figure 2.** Structural model for the interaction between LC8 (*surface*) and Nek9 recognition motif (*sticks*) based on PDB ID 3E2B. Nek9[Ser944] and Nek9[Q948] are labeled.

**A**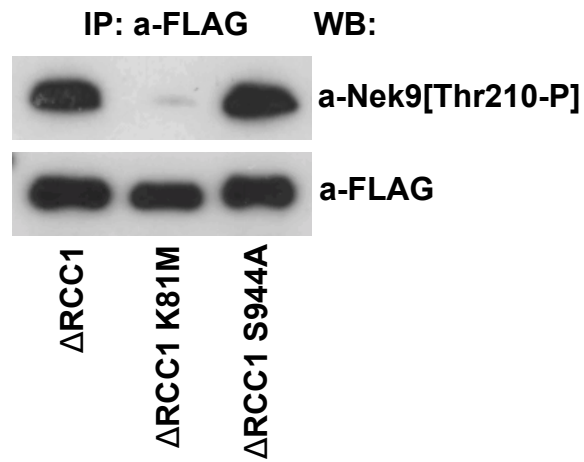**B**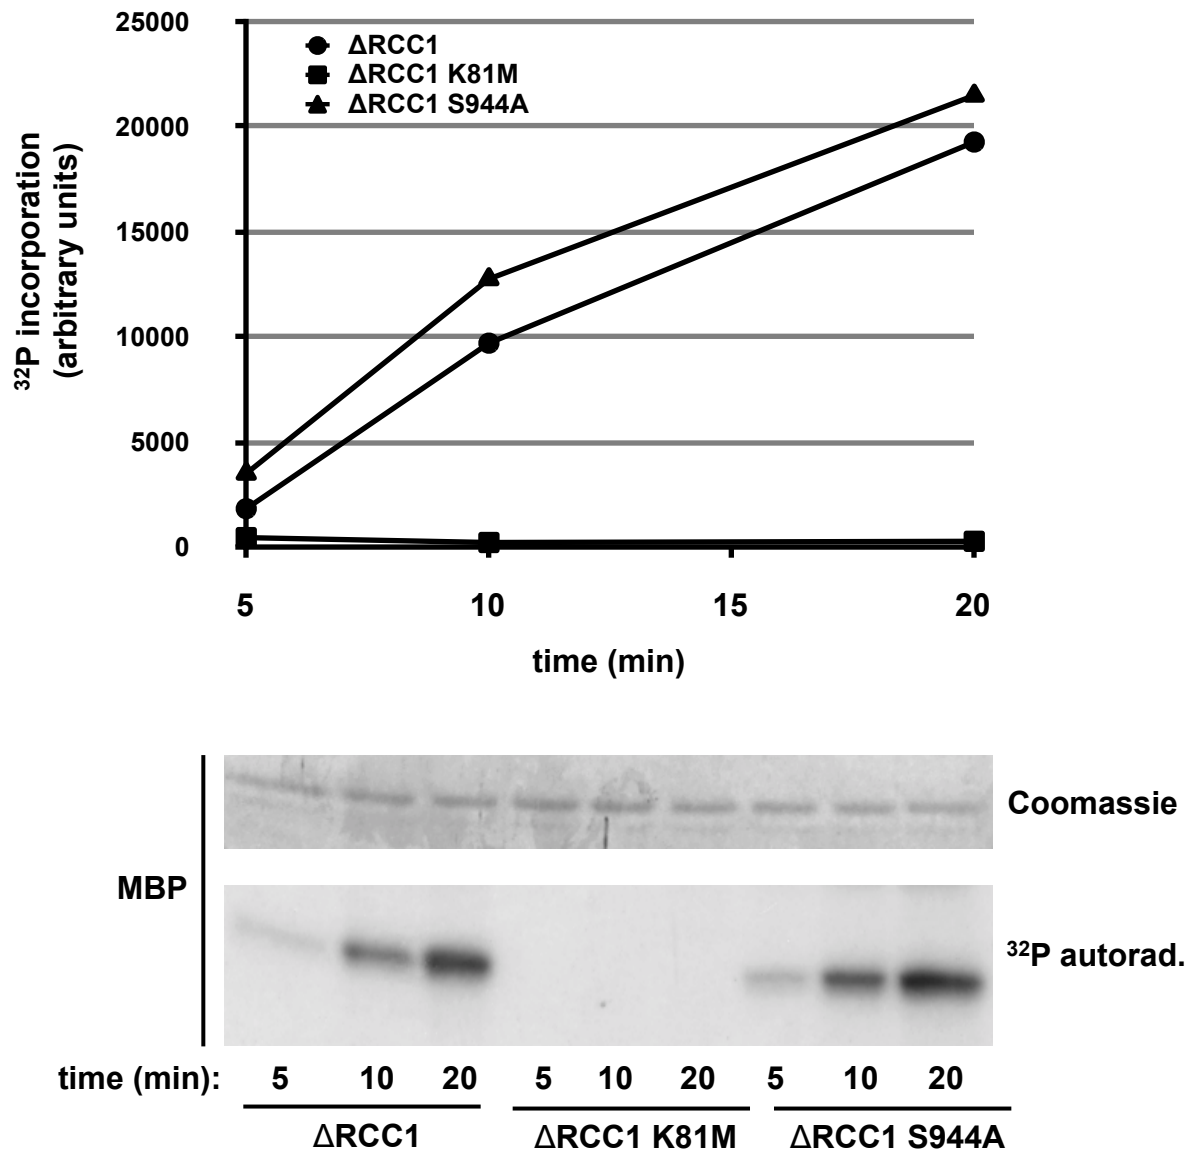

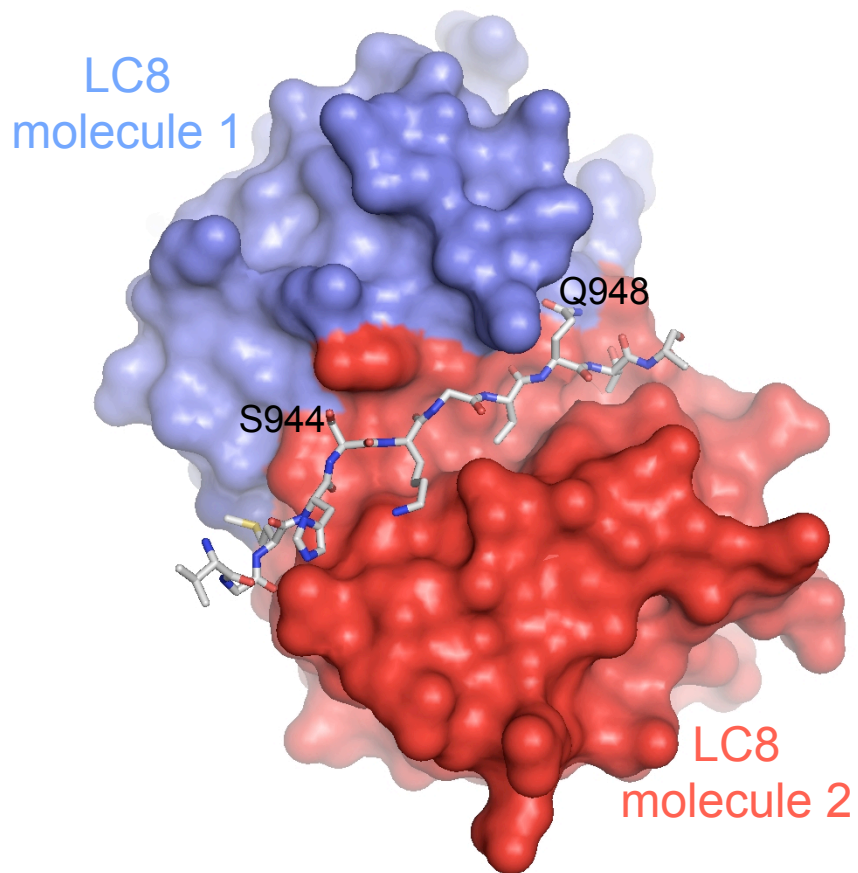

Supplement: supp_M110.209080_jbc.M110.209080-1.pdf [file supp_M110.209080_jbc.M110.209080-1.pdf]
